# Supplementary material
Source: MDPI journal article supplement (https://www.mdpi.com/2073-8994/12/6/911)
Supplement: s1 [file s1]

## Sheet: DATA SHEET
PARTICIPANT	AGE	CRADLING SCORE	CRADLING PREFERENCE	STIMULUS SHEET	PROFILE PREFERENCE	HANDEDNESS QUOTIENT	SELECTED PARTICIPANTS (RESULTS 3.3)
1	23	0	UNBIASED	VERSION A	LEFT-FACING	76.19	EXCLUDED
2	26	6	RIGHT CRADLER	VERSION B	RIGHT-FACING	52.38	SELECTED
3	21	0	UNBIASED	VERSION A	LEFT-FACING	-23.81	EXCLUDED
4	20	2	RIGHT CRADLER	VERSION B	LEFT-FACING	71.43	SELECTED
5	22	2	RIGHT CRADLER	VERSION A	RIGHT-FACING	52.38	SELECTED
6	21	4	RIGHT CRADLER	VERSION B	RIGHT-FACING	42.86	SELECTED
7	19	0	UNBIASED	VERSION A	LEFT-FACING	40.48	EXCLUDED
8	20	0	UNBIASED	VERSION B	LEFT-FACING	66.67	EXCLUDED
9	20	2	RIGHT CRADLER	VERSION A	RIGHT-FACING	16.67	SELECTED
10	25	-6	LEFT CRADLER	VERSION B	LEFT-FACING	90.48	SELECTED
11	19	0	UNBIASED	VERSION A	LEFT-FACING	73.81	EXCLUDED
12	19	-6	LEFT CRADLER	VERSION B	LEFT-FACING	69.05	SELECTED
13	19	0	UNBIASED	VERSION B	RIGHT-FACING	-64.29	EXCLUDED
14	23	-6	LEFT CRADLER	VERSION A	LEFT-FACING	52.38	SELECTED
15	24	-2	LEFT CRADLER	VERSION B	RIGHT-FACING	-42.86	SELECTED
16	25	-4	LEFT CRADLER	VERSION A	LEFT-FACING	28.57	SELECTED
17	25	2	RIGHT CRADLER	VERSION B	LEFT-FACING	100	SELECTED
18	23	-2	LEFT CRADLER	VERSION A	LEFT-FACING	47.62	SELECTED
19	23	-4	LEFT CRADLER	VERSION B	LEFT-FACING	54.76	SELECTED
20	20	2	RIGHT CRADLER	VERSION A	RIGHT-FACING	42.86	SELECTED
21	26	2	RIGHT CRADLER	VERSION B	RIGHT-FACING	21.43	SELECTED
22	25	-2	LEFT CRADLER	VERSION A	LEFT-FACING	45.24	SELECTED
23	24	2	RIGHT CRADLER	VERSION B	RIGHT-FACING	73.81	SELECTED
24	24	0	UNBIASED	VERSION A	LEFT-FACING	97.62	EXCLUDED
25	22	-4	LEFT CRADLER	VERSION A	LEFT-FACING	30.95	SELECTED
26	22	-4	LEFT CRADLER	VERSION B	RIGHT-FACING	78.57	SELECTED
27	21	2	RIGHT CRADLER	VERSION A	LEFT-FACING	50	SELECTED
28	22	4	RIGHT CRADLER	VERSION B	RIGHT-FACING	66.67	SELECTED
29	19	-2	LEFT CRADLER	VERSION A	LEFT-FACING	100	SELECTED
30	31	-4	LEFT CRADLER	VERSION B	RIGHT-FACING	84.62	SELECTED
31	23	4	RIGHT CRADLER	VERSION A	RIGHT-FACING	-33.33	SELECTED
32	23	0	UNBIASED	VERSION B	RIGHT-FACING	100	EXCLUDED
33	26	0	UNBIASED	VERSION A	LEFT-FACING	100	EXCLUDED
34	24	0	UNBIASED	VERSION B	RIGHT-FACING	85.71	EXCLUDED
35	28	-3	LEFT CRADLER	VERSION A	LEFT-FACING	100	SELECTED
36	20	-6	LEFT CRADLER	VERSION B	RIGHT-FACING	100	SELECTED
37	26	6	RIGHT CRADLER	VERSION A	LEFT-FACING	100	SELECTED
38	23	4	RIGHT CRADLER	VERSION B	LEFT-FACING	81.82	SELECTED
39	19	-2	LEFT CRADLER	VERSION A	RIGHT-FACING	73.91	SELECTED
40	20	-4	LEFT CRADLER	VERSION B	RIGHT-FACING	88.89	SELECTED
41	23	-4	LEFT CRADLER	VERSION A	LEFT-FACING	89.47	SELECTED
42	22	-6	LEFT CRADLER	VERSION B	LEFT-FACING	62.5	SELECTED
43	21	0	UNBIASED	VERSION A	RIGHT-FACING	93.33	EXCLUDED
44	20	-4	LEFT CRADLER	VERSION B	LEFT-FACING	100	SELECTED
45	19	-6	LEFT CRADLER	VERSION A	LEFT-FACING	100	SELECTED
46	20	2	RIGHT CRADLER	VERSION B	RIGHT-FACING	100	SELECTED
47	26	2	RIGHT CRADLER	VERSION B	RIGHT-FACING	100	SELECTED
48	24	-2	LEFT CRADLER	VERSION A	LEFT-FACING	100	SELECTED
49	19	4	RIGHT CRADLER	VERSION B	RIGHT-FACING	100	SELECTED
50	19	2	RIGHT CRADLER	VERSION A	LEFT-FACING	64.71	SELECTED
51	19	-2	LEFT CRADLER	VERSION B	RIGHT-FACING	52.38	SELECTED
52	20	-2	LEFT CRADLER	VERSION A	LEFT-FACING	100	SELECTED
53	19	-2	LEFT CRADLER	VERSION B	LEFT-FACING	0	SELECTED
54	27	4	RIGHT CRADLER	VERSION A	RIGHT-FACING	100	SELECTED
55	21	4	RIGHT CRADLER	VERSION B	RIGHT-FACING	100	SELECTED
56	19	-2	LEFT CRADLER	VERSION A	LEFT-FACING	100	SELECTED
57	20	4	RIGHT CRADLER	VERSION B	RIGHT-FACING	100	SELECTED
58	19	0	UNBIASED	VERSION A	RIGHT-FACING	45.45	EXCLUDED
59	19	-4	LEFT CRADLER	VERSION B	LEFT-FACING	100	SELECTED
60	19	-2	LEFT CRADLER	VERSION A	RIGHT-FACING	100	SELECTED
61	20	-2	LEFT CRADLER	VERSION B	RIGHT-FACING	100	SELECTED
62	19	-2	LEFT CRADLER	VERSION A	LEFT-FACING	100	SELECTED
63	20	-6	LEFT CRADLER	VERSION B	RIGHT-FACING	83.33	SELECTED
64	19	-2	LEFT CRADLER	VERSION A	LEFT-FACING	69.23	SELECTED
65	20	0	UNBIASED	VERSION B	LEFT-FACING	100	EXCLUDED
66	19	-2	LEFT CRADLER	VERSION A	LEFT-FACING	100	SELECTED
67	20	-4	LEFT CRADLER	VERSION B	LEFT-FACING	76	SELECTED
68	21	-6	LEFT CRADLER	VERSION A	LEFT-FACING	100	SELECTED
69	21	2	RIGHT CRADLER	VERSION B	RIGHT-FACING	57.14	SELECTED
70	23	-2	LEFT CRADLER	VERSION A	LEFT-FACING	100	SELECTED
71	21	-2	LEFT CRADLER	VERSION B	RIGHT-FACING	100	SELECTED
72	22	2	RIGHT CRADLER	VERSION A	LEFT-FACING	100	SELECTED
73	26	-4	LEFT CRADLER	VERSION B	RIGHT-FACING	92.86	SELECTED
74	31	0	UNBIASED	VERSION A	LEFT-FACING	100	EXCLUDED
75	25	0	UNBIASED	VERSION B	LEFT-FACING	93.1	EXCLUDED
76	27	-4	LEFT CRADLER	VERSION A	RIGHT-FACING	100	SELECTED
77	20	-4	LEFT CRADLER	VERSION A	RIGHT-FACING	100	SELECTED
78	19	6	RIGHT CRADLER	VERSION B	LEFT-FACING	100	SELECTED
79	34	-2	LEFT CRADLER	VERSION A	LEFT-FACING	71.43	SELECTED
80	20	0	UNBIASED	VERSION B	LEFT-FACING	80.95	EXCLUDED
81	22	2	RIGHT CRADLER	VERSION A	RIGHT-FACING	100	SELECTED
82	21	-6	LEFT CRADLER	VERSION B	RIGHT-FACING	100	SELECTED
83	19	0	UNBIASED	VERSION A	LEFT-FACING	100	EXCLUDED
84	18	-4	LEFT CRADLER	VERSION B	RIGHT-FACING	100	SELECTED
85	20	-4	LEFT CRADLER	VERSION A	LEFT-FACING	77.78	SELECTED
86	20	-4	LEFT CRADLER	VERSION B	LEFT-FACING	69.23	SELECTED
87	19	-2	LEFT CRADLER	VERSION A	LEFT-FACING	-25	SELECTED
88	29	-6	LEFT CRADLER	VERSION B	RIGHT-FACING	100	SELECTED
89	19	0	UNBIASED	VERSION B	RIGHT-FACING	100	EXCLUDED
90	22	-6	LEFT CRADLER	VERSION A	RIGHT-FACING	100	SELECTED
91	20	-4	LEFT CRADLER	VERSION B	RIGHT-FACING	100	SELECTED
92	19	-1	LEFT CRADLER	VERSION A	LEFT-FACING	100	SELECTED
93	22	-6	LEFT CRADLER	VERSION B	LEFT-FACING	100	SELECTED
94	19	0	UNBIASED	VERSION A	RIGHT-FACING	100	EXCLUDED
95	22	-2	LEFT CRADLER	VERSION B	LEFT-FACING	100	SELECTED
96	21	-1	LEFT CRADLER	VERSION A	LEFT-FACING	100	SELECTED
97	19	-4	LEFT CRADLER	VERSION B	RIGHT-FACING	100	SELECTED
98	18	-6	LEFT CRADLER	VERSION A	RIGHT-FACING	87.5	SELECTED
99	20	-6	LEFT CRADLER	VERSION B	LEFT-FACING	90.48	SELECTED
100	18	-5	LEFT CRADLER	VERSION A	LEFT-FACING	100	SELECTED
101	19	1	RIGHT CRADLER	VERSION A	RIGHT-FACING	100	SELECTED
102	23	-2	LEFT CRADLER	VERSION B	RIGHT-FACING	88.89	SELECTED
103	23	-2	LEFT CRADLER	VERSION A	LEFT-FACING	100	SELECTED
104	23	0	UNBIASED	VERSION B	RIGHT-FACING	100	EXCLUDED
105	23	-2	LEFT CRADLER	VERSION A	LEFT-FACING	83.33	SELECTED
106	25	0	UNBIASED	VERSION B	RIGHT-FACING	100	EXCLUDED
107	21	-2	LEFT CRADLER	VERSION A	LEFT-FACING	82.61	SELECTED
108	20	2	RIGHT CRADLER	VERSION B	LEFT-FACING	-94.44	SELECTED
109	21	-6	LEFT CRADLER	VERSION A	LEFT-FACING	-100	SELECTED
110	23	4	RIGHT CRADLER	VERSION B	RIGHT-FACING	90.48	SELECTED
111	21	2	RIGHT CRADLER	VERSION A	RIGHT-FACING	100	SELECTED
112	21	-4	LEFT CRADLER	VERSION B	RIGHT-FACING	85.71	SELECTED
113	23	-2	LEFT CRADLER	VERSION B	RIGHT-FACING	100	SELECTED
114	28	-4	LEFT CRADLER	VERSION A	LEFT-FACING	100	SELECTED
115	24	-6	LEFT CRADLER	VERSION B	RIGHT-FACING	100	SELECTED
116	23	0	UNBIASED	VERSION A	LEFT-FACING	100	EXCLUDED
117	19	-6	LEFT CRADLER	VERSION B	RIGHT-FACING	100	SELECTED
118	21	6	RIGHT CRADLER	VERSION A	LEFT-FACING	41.18	SELECTED
119	26	0	UNBIASED	VERSION B	LEFT-FACING	100	EXCLUDED
120	19	6	RIGHT CRADLER	VERSION A	LEFT-FACING	100	SELECTED
121	19	-2	LEFT CRADLER	VERSION B	LEFT-FACING	100	SELECTED
122	21	6	RIGHT CRADLER	VERSION A	RIGHT-FACING	-73.33	SELECTED
123	22	-3	LEFT CRADLER	VERSION B	RIGHT-FACING	80.95	SELECTED
124	23	-4	LEFT CRADLER	VERSION A	LEFT-FACING	100	SELECTED
125	30	4	RIGHT CRADLER	VERSION A	RIGHT-FACING	60	SELECTED
126	19	-4	LEFT CRADLER	VERSION B	RIGHT-FACING	73.33	SELECTED
127	18	-6	LEFT CRADLER	VERSION A	LEFT-FACING	66.67	SELECTED
128	20	-3	LEFT CRADLER	VERSION B	RIGHT-FACING	85.71	SELECTED
129	20	2	RIGHT CRADLER	VERSION A	LEFT-FACING	46.67	SELECTED
130	20	-2	LEFT CRADLER	VERSION B	RIGHT-FACING	100	SELECTED
131	20	-2	LEFT CRADLER	VERSION A	LEFT-FACING	100	SELECTED
132	22	6	RIGHT CRADLER	VERSION B	RIGHT-FACING	83.33	SELECTED
133	19	2	RIGHT CRADLER	VERSION A	RIGHT-FACING	100	SELECTED
134	20	0	UNBIASED	VERSION B	RIGHT-FACING	47.37	EXCLUDED
135	19	-2	LEFT CRADLER	VERSION A	LEFT-FACING	86.67	SELECTED
136	18	-2	LEFT CRADLER	VERSION B	RIGHT-FACING	100	SELECTED
137	19	-4	LEFT CRADLER	VERSION B	RIGHT-FACING	93.1	SELECTED
138	19	-4	LEFT CRADLER	VERSION A	RIGHT-FACING	-7.69	SELECTED
139	24	-6	LEFT CRADLER	VERSION B	LEFT-FACING	100	SELECTED
140	20	-2	LEFT CRADLER	VERSION A	LEFT-FACING	100	SELECTED
141	22	-4	LEFT CRADLER	VERSION B	RIGHT-FACING	100	EXCLUDED
142	20	-2	LEFT CRADLER	VERSION A	RIGHT-FACING	69.23	EXCLUDED
143	21	4	RIGHT CRADLER	VERSION B	LEFT-FACING	100	SELECTED
144	19	0	UNBIASED	VERSION A	LEFT-FACING	85.71	EXCLUDED
145	19	0	UNBIASED	VERSION B	RIGHT-FACING	100	EXCLUDED
146	19	-2	LEFT CRADLER	VERSION A	LEFT-FACING	100	EXCLUDED
147	23	-3	LEFT CRADLER	VERSION B	RIGHT-FACING	100	EXCLUDED
148	19	-4	LEFT CRADLER	VERSION A	LEFT-FACING	86.67	EXCLUDED
149	19	6	RIGHT CRADLER	VERSION A	LEFT-FACING	100	SELECTED
150	18	0	UNBIASED	VERSION B	RIGHT-FACING	100	EXCLUDED
151	19	-2	LEFT CRADLER	VERSION A	LEFT-FACING	100	EXCLUDED
152	20	0	UNBIASED	VERSION B	RIGHT-FACING	77.78	EXCLUDED
153	20	2	RIGHT CRADLER	VERSION A	RIGHT-FACING	100	SELECTED
154	27	-2	LEFT CRADLER	VERSION B	RIGHT-FACING	100	EXCLUDED
155	20	-6	LEFT CRADLER	VERSION A	RIGHT-FACING	100	EXCLUDED
156	20	0	UNBIASED	VERSION B	LEFT-FACING	100	EXCLUDED
157	20	-4	LEFT CRADLER	VERSION A	LEFT-FACING	100	EXCLUDED
158	20	0	UNBIASED	VERSION B	RIGHT-FACING	100	EXCLUDED
159	23	6	RIGHT CRADLER	VERSION A	LEFT-FACING	100	SELECTED
160	21	-2	LEFT CRADLER	VERSION B	RIGHT-FACING	88.24	EXCLUDED
161	19	2	RIGHT CRADLER	VERSION B	RIGHT-FACING	33.33	SELECTED
162	19	-4	LEFT CRADLER	VERSION A	RIGHT-FACING	100	EXCLUDED
163	19	2	RIGHT CRADLER	VERSION B	LEFT-FACING	100	SELECTED
164	23	-2	LEFT CRADLER	VERSION A	LEFT-FACING	73.33	EXCLUDED
165	21	2	RIGHT CRADLER	VERSION B	RIGHT-FACING	-85.71	SELECTED
166	30	-6	LEFT CRADLER	VERSION A	LEFT-FACING	88.57	EXCLUDED
167	23	6	RIGHT CRADLER	VERSION B	RIGHT-FACING	100	SELECTED
168	18	-2	LEFT CRADLER	VERSION A	RIGHT-FACING	100	EXCLUDED
169	19	6	RIGHT CRADLER	VERSION B	LEFT-FACING	90.48	SELECTED
170	19	-6	LEFT CRADLER	VERSION A	LEFT-FACING	41.18	EXCLUDED
171	20	2	RIGHT CRADLER	VERSION B	LEFT-FACING	64.71	SELECTED
172	19	0	UNBIASED	VERSION A	LEFT-FACING	100	EXCLUDED
173	22	0	UNBIASED	VERSION A	RIGHT-FACING	100	EXCLUDED
174	30	-6	LEFT CRADLER	VERSION B	RIGHT-FACING	-29.41	EXCLUDED
175	19	-2	LEFT CRADLER	VERSION A	LEFT-FACING	90	EXCLUDED
176	24	0	UNBIASED	VERSION B	LEFT-FACING	75	EXCLUDED
177	23	-2	LEFT CRADLER	VERSION A	RIGHT-FACING	100	EXCLUDED
178	28	-1	LEFT CRADLER	VERSION B	RIGHT-FACING	100	EXCLUDED
179	20	-2	LEFT CRADLER	VERSION A	LEFT-FACING	84.62	EXCLUDED
180	21	0	UNBIASED	VERSION B	RIGHT-FACING	33.33	EXCLUDED
181	21	-6	LEFT CRADLER	VERSION A	RIGHT-FACING	-70.37	EXCLUDED
182	21	-1	LEFT CRADLER	VERSION B	RIGHT-FACING	71.43	EXCLUDED
183	23	2	RIGHT CRADLER	VERSION A	LEFT-FACING	92.59	SELECTED
184	25	-6	LEFT CRADLER	VERSION B	RIGHT-FACING	28.57	EXCLUDED
185	24	2	RIGHT CRADLER	VERSION B	LEFT-FACING	68.42	SELECTED
186	20	-6	LEFT CRADLER	VERSION A	LEFT-FACING	100	EXCLUDED
187	20	2	RIGHT CRADLER	VERSION A	RIGHT-FACING	62.5	SELECTED
188	20	-2	LEFT CRADLER	VERSION A	LEFT-FACING	-84.62	EXCLUDED
189	21	-2	LEFT CRADLER	VERSION A	LEFT-FACING	80.95	EXCLUDED
190	20	-2	LEFT CRADLER	VERSION A	LEFT-FACING	100	EXCLUDED
191	20	-4	LEFT CRADLER	VERSION A	LEFT-FACING	100	EXCLUDED
192	22	6	RIGHT CRADLER	VERSION A	RIGHT-FACING	100	SELECTED
193	29	0	UNBIASED	VERSION A	RIGHT-FACING	100	EXCLUDED
194	23	-6	LEFT CRADLER	VERSION A	LEFT-FACING	69.23	EXCLUDED
195	22	2	RIGHT CRADLER	VERSION A	LEFT-FACING	100	SELECTED
196	25	0	UNBIASED	VERSION A	LEFT-FACING	53.85	EXCLUDED
197	21	-6	LEFT CRADLER	VERSION A	LEFT-FACING	85.71	EXCLUDED
198	21	-4	LEFT CRADLER	VERSION A	LEFT-FACING	87.5	EXCLUDED
199	23	0	UNBIASED	VERSION A	RIGHT-FACING	100	EXCLUDED
200	22	2	RIGHT CRADLER	VERSION A	RIGHT-FACING	94.59	SELECTED
201	21	4	RIGHT CRADLER	VERSION A	LEFT-FACING	86.67	SELECTED
202	22	0	UNBIASED	VERSION B	RIGHT-FACING	100	EXCLUDED
203	26	-4	LEFT CRADLER	VERSION A	LEFT-FACING	100	EXCLUDED
204	22	-4	LEFT CRADLER	VERSION B	RIGHT-FACING	61.9	EXCLUDED
205	21	-2	LEFT CRADLER	VERSION A	LEFT-FACING	100	EXCLUDED
206	21	-2	LEFT CRADLER	VERSION B	LEFT-FACING	69.23	EXCLUDED
207	21	6	RIGHT CRADLER	VERSION A	RIGHT-FACING	100	SELECTED
208	21	-4	LEFT CRADLER	VERSION B	RIGHT-FACING	100	EXCLUDED
209	20	-4	LEFT CRADLER	VERSION A	LEFT-FACING	100	EXCLUDED
210	21	2	RIGHT CRADLER	VERSION B	RIGHT-FACING	-39.13	SELECTED
211	23	2	RIGHT CRADLER	VERSION A	RIGHT-FACING	100	SELECTED
212	22	-4	LEFT CRADLER	VERSION B	RIGHT-FACING	100	EXCLUDED
213	21	-6	LEFT CRADLER	VERSION B	RIGHT-FACING	87.88	EXCLUDED
214	21	-2	LEFT CRADLER	VERSION A	LEFT-FACING	100	EXCLUDED
215	21	0	UNBIASED	VERSION B	LEFT-FACING	100	EXCLUDED
216	22	-6	LEFT CRADLER	VERSION A	RIGHT-FACING	69.23	EXCLUDED
217	22	2	RIGHT CRADLER	VERSION B	RIGHT-FACING	100	SELECTED
218	21	-6	LEFT CRADLER	VERSION A	RIGHT-FACING	100	EXCLUDED
219	20	2	RIGHT CRADLER	VERSION B	RIGHT-FACING	100	SELECTED
220	22	6	RIGHT CRADLER	VERSION A	LEFT-FACING	100	SELECTED
221	20	-4	LEFT CRADLER	VERSION B	LEFT-FACING	100	EXCLUDED
222	22	0	UNBIASED	VERSION A	LEFT-FACING	100	EXCLUDED
223	19	0	UNBIASED	VERSION B	RIGHT-FACING	100	EXCLUDED
224	31	2	RIGHT CRADLER	VERSION A	LEFT-FACING	100	SELECTED
225	22	-4	LEFT CRADLER	VERSION A	RIGHT-FACING	100	EXCLUDED
226	21	2	RIGHT CRADLER	VERSION B	RIGHT-FACING	92	SELECTED
227	21	-4	LEFT CRADLER	VERSION A	LEFT-FACING	100	EXCLUDED
228	19	-6	LEFT CRADLER	VERSION B	RIGHT-FACING	100	EXCLUDED
229	18	-2	LEFT CRADLER	VERSION A	LEFT-FACING	100	EXCLUDED
230	22	4	RIGHT CRADLER	VERSION B	LEFT-FACING	84.62	SELECTED
231	21	4	RIGHT CRADLER	VERSION A	RIGHT-FACING	100	SELECTED
232	21	4	RIGHT CRADLER	VERSION B	RIGHT-FACING	100	SELECTED
233	20	-2	LEFT CRADLER	VERSION A	LEFT-FACING	100	EXCLUDED
234	19	2	RIGHT CRADLER	VERSION B	RIGHT-FACING	85.71	SELECTED
235	19	-2	LEFT CRADLER	VERSION A	LEFT-FACING	100	EXCLUDED
236	19	4	RIGHT CRADLER	VERSION B	LEFT-FACING	100	SELECTED
237	19	-2	LEFT CRADLER	VERSION B	RIGHT-FACING	100	EXCLUDED
238	21	4	RIGHT CRADLER	VERSION A	LEFT-FACING	50	SELECTED
239	21	6	RIGHT CRADLER	VERSION B	LEFT-FACING	100	SELECTED
240	21	0	UNBIASED	VERSION A	LEFT-FACING	80	EXCLUDED
241	21	2	RIGHT CRADLER	VERSION B	RIGHT-FACING	100	SELECTED
242	21	-6	LEFT CRADLER	VERSION A	LEFT-FACING	85.71	EXCLUDED
243	21	2	RIGHT CRADLER	VERSION B	RIGHT-FACING	100	SELECTED
244	21	-4	LEFT CRADLER	VERSION A	LEFT-FACING	100	EXCLUDED
245	21	-4	LEFT CRADLER	VERSION B	RIGHT-FACING	100	EXCLUDED
246	22	4	RIGHT CRADLER	VERSION A	RIGHT-FACING	100	SELECTED
247	22	2	RIGHT CRADLER	VERSION B	RIGHT-FACING	50	SELECTED
248	21	-2	LEFT CRADLER	VERSION A	RIGHT-FACING	76.47	EXCLUDED
249	21	4	RIGHT CRADLER	VERSION A	RIGHT-FACING	64.29	SELECTED
250	21	6	RIGHT CRADLER	VERSION B	RIGHT-FACING	56.76	SELECTED
251	21	0	UNBIASED	VERSION A	LEFT-FACING	100	EXCLUDED
252	20	2	RIGHT CRADLER	VERSION B	RIGHT-FACING	80.95	SELECTED
253	20	0	UNBIASED	VERSION A	RIGHT-FACING	100	EXCLUDED
254	25	-6	LEFT CRADLER	VERSION B	RIGHT-FACING	100	EXCLUDED
255	21	0	UNBIASED	VERSION A	RIGHT-FACING	-86.67	EXCLUDED
256	21	-6	LEFT CRADLER	VERSION B	LEFT-FACING	33.33	EXCLUDED
257	20	2	RIGHT CRADLER	VERSION A	LEFT-FACING	100	SELECTED
258	22	-2	LEFT CRADLER	VERSION B	LEFT-FACING	66.67	EXCLUDED
259	23	2	RIGHT CRADLER	VERSION A	LEFT-FACING	100	SELECTED
260	21	-4	LEFT CRADLER	VERSION B	RIGHT-FACING	61.9	EXCLUDED
261	27	-4	LEFT CRADLER	VERSION B	RIGHT-FACING	89.47	EXCLUDED
262	22	0	UNBIASED	VERSION A	RIGHT-FACING	100	EXCLUDED
263	21	-4	LEFT CRADLER	VERSION B	RIGHT-FACING	100	EXCLUDED
264	26	-2	LEFT CRADLER	VERSION A	LEFT-FACING	100	EXCLUDED
265	22	2	RIGHT CRADLER	VERSION B	RIGHT-FACING	81.82	EXCLUDED
266	25	-2	LEFT CRADLER	VERSION A	LEFT-FACING	100	EXCLUDED
267	19	0	UNBIASED	VERSION B	RIGHT-FACING	70	EXCLUDED
268	19	0	UNBIASED	VERSION A	LEFT-FACING	100	EXCLUDED
269	25	4	RIGHT CRADLER	VERSION B	RIGHT-FACING	100	EXCLUDED
270	22	-6	LEFT CRADLER	VERSION A	LEFT-FACING	50	EXCLUDED
271	22	-6	LEFT CRADLER	VERSION B	RIGHT-FACING	100	EXCLUDED
272	22	0	UNBIASED	VERSION A	LEFT-FACING	100	EXCLUDED
273	21	-2	LEFT CRADLER	VERSION A	LEFT-FACING	100	EXCLUDED
274	29	4	RIGHT CRADLER	VERSION B	RIGHT-FACING	100	EXCLUDED
275	22	4	RIGHT CRADLER	VERSION A	RIGHT-FACING	100	SELECTED
276	23	-2	LEFT CRADLER	VERSION B	RIGHT-FACING	100	EXCLUDED
277	22	0	UNBIASED	VERSION A	LEFT-FACING	100	EXCLUDED
278	22	-2	LEFT CRADLER	VERSION B	RIGHT-FACING	100	EXCLUDED
279	20	-4	LEFT CRADLER	VERSION A	RIGHT-FACING	76.47	EXCLUDED
280	20	0	UNBIASED	VERSION A	RIGHT-FACING	100	EXCLUDED
281	23	-2	LEFT CRADLER	VERSION A	LEFT-FACING	100	EXCLUDED
282	22	6	RIGHT CRADLER	VERSION A	RIGHT-FACING	90.48	SELECTED
283	22	4	RIGHT CRADLER	VERSION A	LEFT-FACING	70	SELECTED
284	28	1	RIGHT CRADLER	VERSION A	RIGHT-FACING	86.21	EXCLUDED
